# Supplementary material for: Serious Underlying Medical Conditions and COVID-19 Vaccine Hesitancy: A Large Cross-Sectional Analysis from Australia
Source: MDPI journal article supplement (doi:10.3390/vaccines10060851), 2022-05-26

## Supplementary materials

These supplementary materials have been provided by the authors to give readers additional information about their work

Supplement to: Serious Underlying Medical Conditions and COVID-19 Vaccine Hesitancy: A Large Cross-sectional Analysis From Australia.

### Table of contents

|                                                                                                                                                                                                      |   |
|------------------------------------------------------------------------------------------------------------------------------------------------------------------------------------------------------|---|
| List of CANVACCS, DIABVACCS, and MSVACCS investigators.....                                                                                                                                          | 2 |
| Table S1. Chronic disease COVID-19 Vaccine Survey Items. ....                                                                                                                                        | 3 |
| Table S2. Participant characteristics, by vaccination status and disease.....                                                                                                                        | 8 |
| Figure S1. Response frequencies for each Disease Influenced Vaccine Acceptance Scale-Six item, by chronic disease type and vaccination status (a-f). 'Don't know' responses have been excluded. .... | 9 |

## List of CANVACCS, DIABVACCS, and MSVACCS investigators

| Study Site, Australian State                                  | Investigator(s)        |
|---------------------------------------------------------------|------------------------|
| <b>Monash Health, Victoria</b>                                |                        |
| CANVACCS                                                      | Veronica Lopez Aedo    |
|                                                               | Elizabeth Ahern        |
|                                                               | Muhammad Alamgeer      |
|                                                               | Nathan Bain            |
|                                                               | Amy Body               |
|                                                               | Peter Briggs           |
|                                                               | Daphne Day             |
|                                                               | Sophia Frentzas        |
|                                                               | Lisa Grech             |
|                                                               | Marion Harris          |
|                                                               | Gwo-Yaw Ho             |
|                                                               | Caroline Lum           |
|                                                               | Vi Luong               |
|                                                               | Amelia McCartney       |
|                                                               | Cameron McLaren        |
|                                                               | Mike Nguyen            |
|                                                               | Stephen Opat           |
|                                                               | David Pook             |
|                                                               | Eva Segelov            |
|                                                               | Andrew Strickland      |
|                                                               | Avraham Travers        |
|                                                               | Kate Webber            |
|                                                               | Michelle White         |
|                                                               | Walid Zwieky           |
| DIABVACCS                                                     | Barbora de Courten     |
|                                                               | Jennifer Wong          |
| MSVACCS                                                       | Michelle Allan         |
|                                                               | Ernest Butler          |
| <b>Bendigo Health, Victoria</b>                               |                        |
| CANVACCS                                                      | Sam Harris             |
| DIABVACCS                                                     | Frank Gao              |
|                                                               | Amy Harding            |
|                                                               | Mark Savage            |
| <b>Latrobe Regional Hospital, Victoria</b>                    |                        |
| CANVACCS                                                      | Hieu Chau              |
| <b>Sunshine Coast Hospital and Health Service, Queensland</b> |                        |
| CANVACCS                                                      | Bryan Chan             |
| DIABVACCS                                                     | Brett Sillars          |
| MSVACCS                                                       | Joshua Barton          |
|                                                               | Antony Winkel          |
| <b>Icon Cancer Centre Hobart, Tasmania</b>                    |                        |
| CANVACCS                                                      | Louise Nott            |
| <b>Central Coast Haematology, New South Wales</b>             |                        |
| CANVACCS                                                      | Richard Blennerhassett |
|                                                               | Cecily Forsyth         |
|                                                               | Jacqueline Jagger      |
| <b>St Vincent's Hospital Sydney, New South Wales</b>          |                        |
| CANVACCS                                                      | Nada Hamad             |
| <b>Campbelltown Hospital, New South Wales</b>                 |                        |
| CANVACCS                                                      | Annette Tognela        |
| <b>Dr David Hoffman, New South Wales</b>                      |                        |
| DIABVACCS                                                     | David Hoffman          |
| <b>Border Medical Oncology, New South Wales</b>               |                        |
| CANVACCS                                                      | Craig Underhill        |

Abbreviations: CANVACCS, CANcer patients' perspectives on coronavirus VACCination Survey; DIABVACCS, DIABetes patients' perspectives on coronavirus VACCination Survey; MSVACCS, Multiple Sclerosis patients' perspectives on coronavirus VACCination Survey.

**Table S1. Chronic disease COVID-19 Vaccine Survey Items.**

| Screening items                                                                                                                                                                                                                               |                                                                                                                                                                                                                                                                                                                                                       |
|-----------------------------------------------------------------------------------------------------------------------------------------------------------------------------------------------------------------------------------------------|-------------------------------------------------------------------------------------------------------------------------------------------------------------------------------------------------------------------------------------------------------------------------------------------------------------------------------------------------------|
| 1. Are you 18 years or older?                                                                                                                                                                                                                 | <input type="radio"/> Yes<br><input type="radio"/> No (Terminate if No)                                                                                                                                                                                                                                                                               |
| 2. Have you got [chronic disease]?                                                                                                                                                                                                            | <input type="radio"/> Yes<br><input type="radio"/> No (Terminate if No)                                                                                                                                                                                                                                                                               |
| 3. Are you a [participating site] patient?                                                                                                                                                                                                    | <input type="radio"/> Yes<br><input type="radio"/> No (Terminate if No)                                                                                                                                                                                                                                                                               |
| Vaccination status                                                                                                                                                                                                                            |                                                                                                                                                                                                                                                                                                                                                       |
| 4. Have you already received a COVID-19 vaccine?                                                                                                                                                                                              | <input type="radio"/> Yes, 1 dose only<br><input type="radio"/> Yes, 2 doses<br><input type="radio"/> No                                                                                                                                                                                                                                              |
| Oxford COVID-19 Vaccine Hesitancy Scale                                                                                                                                                                                                       |                                                                                                                                                                                                                                                                                                                                                       |
| Instructions: We would like to know your feelings and thoughts about the COVID-19 vaccine. Note: If you have already been vaccinated against COVID-19, please complete these questions in relation to a future COVID-19 vaccine dose/booster. |                                                                                                                                                                                                                                                                                                                                                       |
| 5. Would you take a COVID-19 vaccine if offered?                                                                                                                                                                                              | <input type="radio"/> Definitely/have taken<br><input type="radio"/> Probably<br><input type="radio"/> I may or may not<br><input type="radio"/> Probably not<br><input type="radio"/> Definitely not<br><input type="radio"/> Don't know                                                                                                             |
| 6. When a COVID-19 vaccine is available:                                                                                                                                                                                                      | <input type="radio"/> I will want to get it as soon as possible<br><input type="radio"/> I will take it when offered<br><input type="radio"/> I'm not sure what I will do<br><input type="radio"/> I will put off (delay) getting it<br><input type="radio"/> I will refuse to get it<br><input type="radio"/> Don't know                             |
| 7. I would describe my attitude towards receiving a COVID-19 vaccine as:                                                                                                                                                                      | <input type="radio"/> Very keen<br><input type="radio"/> Pretty positive<br><input type="radio"/> Neutral<br><input type="radio"/> Quite uneasy<br><input type="radio"/> Against it<br><input type="radio"/> Don't know                                                                                                                               |
| 8. If a COVID-19 vaccine was available in my local area, I would:                                                                                                                                                                             | <input type="radio"/> Get it as soon as possible<br><input type="radio"/> Get it when I have time<br><input type="radio"/> Delay getting it<br><input type="radio"/> Avoid getting it for as long as possible<br><input type="radio"/> Never get it<br><input type="radio"/> Don't know                                                               |
| 9. If my family or friends were thinking of getting a COVID-19 vaccination, I would:                                                                                                                                                          | <input type="radio"/> Strongly encourage them<br><input type="radio"/> Encourage them<br><input type="radio"/> Not say anything to them about it<br><input type="radio"/> Ask them to delay getting the vaccination<br><input type="radio"/> Suggest that they do not get the vaccination<br><input type="radio"/> Don't know                         |
| 10. I would describe myself as:                                                                                                                                                                                                               | <input type="radio"/> Eager to get a COVID-19 vaccine<br><input type="radio"/> Willing to get the COVID-19 vaccine<br><input type="radio"/> Not bothered about getting the COVID-19 vaccine<br><input type="radio"/> Unwilling to get the COVID-19 vaccine<br><input type="radio"/> Anti-vaccination for COVID-19<br><input type="radio"/> Don't know |
| 11. Taking a COVID-19 vaccination is:                                                                                                                                                                                                         | <input type="radio"/> Really important<br><input type="radio"/> Important<br><input type="radio"/> Neither important nor unimportant<br><input type="radio"/> Unimportant<br><input type="radio"/> Really unimportant<br><input type="radio"/> Don't know                                                                                             |
| Oxford COVID-19 Vaccine Confidence and Complacency Scale                                                                                                                                                                                      |                                                                                                                                                                                                                                                                                                                                                       |
| 12. Do you think you will be infected with COVID-19 over the next 12 months?                                                                                                                                                                  | <input type="radio"/> Definitely<br><input type="radio"/> Probably<br><input type="radio"/> Possibly<br><input type="radio"/> Probably not                                                                                                                                                                                                            |

|                                                                                  |                                                                                                                                                                                                                                                                                                                                                                                           |
|----------------------------------------------------------------------------------|-------------------------------------------------------------------------------------------------------------------------------------------------------------------------------------------------------------------------------------------------------------------------------------------------------------------------------------------------------------------------------------------|
|                                                                                  | <input type="radio"/> Definitely not<br><input type="radio"/> Don't know                                                                                                                                                                                                                                                                                                                  |
| 13. I think the COVID-19 vaccine is likely to:                                   | <input type="radio"/> Work for almost everyone<br><input type="radio"/> Work for most people<br><input type="radio"/> I am unsure how many people it will work for<br><input type="radio"/> Not work for most people<br><input type="radio"/> Not work for anyone<br><input type="radio"/> Don't know                                                                                     |
| 14. I think the COVID-19 vaccine is likely to:                                   | <input type="radio"/> Definitely work for me<br><input type="radio"/> Probably work for me<br><input type="radio"/> May or may not work for me<br><input type="radio"/> Probably not work for me<br><input type="radio"/> Definitely not work for me<br><input type="radio"/> Don't know                                                                                                  |
| 15. I think if I get the COVID-19 vaccine it will be:                            | <input type="radio"/> Really helpful for the community around me<br><input type="radio"/> Helpful for the community around me<br><input type="radio"/> Neither helpful nor unhelpful for the community around me<br><input type="radio"/> Unhelpful for the community around me<br><input type="radio"/> Really unhelpful for the community around me<br><input type="radio"/> Don't know |
| 16. I think if individuals like me get the COVID-19 vaccine it will:             | <input type="radio"/> Save a large number of lives<br><input type="radio"/> Save some lives<br><input type="radio"/> Have no impact<br><input type="radio"/> Lead to more deaths<br><input type="radio"/> Lead to a large number of deaths<br><input type="radio"/> Don't know                                                                                                            |
| 17. I think the speed of developing and testing the vaccine means it will be:    | <input type="radio"/> Really good<br><input type="radio"/> Good<br><input type="radio"/> Will not affect how good or bad it is<br><input type="radio"/> Bad<br><input type="radio"/> Really bad<br><input type="radio"/> Don't know                                                                                                                                                       |
| 18. I think the speed of developing and testing the vaccine means it will be:    | <input type="radio"/> Really safe<br><input type="radio"/> Safe<br><input type="radio"/> It will not affect how safe it is<br><input type="radio"/> Unsafe<br><input type="radio"/> Really unsafe<br><input type="radio"/> Don't know                                                                                                                                                     |
| 19. I think if many people do not get the vaccine this:                          | <input type="radio"/> Will be dangerous<br><input type="radio"/> May be dangerous<br><input type="radio"/> Will have no consequences at all<br><input type="radio"/> May be good<br><input type="radio"/> Will be good<br><input type="radio"/> Don't know                                                                                                                                |
| 20. I expect that receiving the vaccine will be:                                 | <input type="radio"/> Hardly noticeable<br><input type="radio"/> A little unpleasant<br><input type="radio"/> Moderately unpleasant<br><input type="radio"/> Painful<br><input type="radio"/> Extremely painful<br><input type="radio"/> Don't know                                                                                                                                       |
| 21. I think the side-effects for people of getting the COVID-19 vaccine will be: | <input type="radio"/> None<br><input type="radio"/> Mild<br><input type="radio"/> Moderate<br><input type="radio"/> Significant<br><input type="radio"/> Life-threatening<br><input type="radio"/> Don't know                                                                                                                                                                             |
| 22. I think the COVID-19 vaccine will:                                           | <input type="radio"/> Greatly strengthen my immune system<br><input type="radio"/> Strengthen my immune system<br><input type="radio"/> It will neither strengthen nor weaken my immune system<br><input type="radio"/> Weaken my immune system<br><input type="radio"/> Greatly weaken my immune system<br><input type="radio"/> Don't know                                              |
| 23. I think taking the COVID-19 vaccine:                                         | <input type="radio"/> Will give me complete freedom to get on with life just as before<br><input type="radio"/> Will give me greater freedom                                                                                                                                                                                                                                              |

|                                                                                                                                                                                                                                                                                                                                                                                                      |                                                                                                                                                                                                                                                                                               |
|------------------------------------------------------------------------------------------------------------------------------------------------------------------------------------------------------------------------------------------------------------------------------------------------------------------------------------------------------------------------------------------------------|-----------------------------------------------------------------------------------------------------------------------------------------------------------------------------------------------------------------------------------------------------------------------------------------------|
|                                                                                                                                                                                                                                                                                                                                                                                                      | <input type="radio"/> Will have no effect on my freedom<br><input type="radio"/> Will restrict my freedom<br><input type="radio"/> Will completely restrict my freedom to get on with life<br><input type="radio"/> Don't know                                                                |
| 24. I think getting the vaccine is a sign of:                                                                                                                                                                                                                                                                                                                                                        | <input type="radio"/> Great personal strength<br><input type="radio"/> Personal strength<br><input type="radio"/> Not a sign of personal strength or weakness<br><input type="radio"/> Personal weakness<br><input type="radio"/> Great personal weakness<br><input type="radio"/> Don't know |
| 25. Taking a new COVID-19 vaccine will make me feel like a guinea pig:                                                                                                                                                                                                                                                                                                                               | <input type="radio"/> Do not agree<br><input type="radio"/> Agree a little<br><input type="radio"/> Agree moderately<br><input type="radio"/> Agree a lot<br><input type="radio"/> Completely agree<br><input type="radio"/> Don't know                                                       |
| <b>Disease Influenced Visual Acceptance Scale-Six</b><br>Instructions: We would like to know about how your [chronic disease] may be related to your feelings and thoughts about the COVID-19 vaccine. For each of the following statements, please tap/click the one choice that best represents how strongly you agree or disagree with it. There are 6 choices to choose from for each statement. |                                                                                                                                                                                                                                                                                               |
| 26. My history of [chronic disease] makes me more worried about being infected with COVID-19:                                                                                                                                                                                                                                                                                                        | <input type="radio"/> Strongly agree<br><input type="radio"/> Somewhat agree<br><input type="radio"/> Neither disagree nor agree<br><input type="radio"/> Somewhat disagree<br><input type="radio"/> Strongly disagree<br><input type="radio"/> Don't know                                    |
| 27. My history of [chronic disease] means having the vaccine is more important to me:                                                                                                                                                                                                                                                                                                                | <input type="radio"/> Strongly agree<br><input type="radio"/> Somewhat agree<br><input type="radio"/> Neither disagree nor agree<br><input type="radio"/> Somewhat disagree<br><input type="radio"/> Strongly disagree<br><input type="radio"/> Don't know                                    |
| 28. My doctor's recommendation regarding the vaccine is important to me:                                                                                                                                                                                                                                                                                                                             | <input type="radio"/> Strongly agree<br><input type="radio"/> Somewhat agree<br><input type="radio"/> Neither disagree nor agree<br><input type="radio"/> Somewhat disagree<br><input type="radio"/> Strongly disagree<br><input type="radio"/> Don't know                                    |
| 29. My history of [chronic disease] makes me worried about how well the vaccine will work for me:                                                                                                                                                                                                                                                                                                    | <input type="radio"/> Strongly disagree<br><input type="radio"/> Somewhat disagree<br><input type="radio"/> Neither disagree nor agree<br><input type="radio"/> Somewhat agree<br><input type="radio"/> Strongly agree<br><input type="radio"/> Don't know                                    |
| 30. My history of [chronic disease] makes me worried about how the vaccine will affect me:                                                                                                                                                                                                                                                                                                           | <input type="radio"/> Strongly disagree<br><input type="radio"/> Somewhat disagree<br><input type="radio"/> Neither disagree nor agree<br><input type="radio"/> Somewhat agree<br><input type="radio"/> Strongly agree<br><input type="radio"/> Don't know                                    |
| 31. I am worried about how the vaccine will affect my [chronic disease] treatment:                                                                                                                                                                                                                                                                                                                   | <input type="radio"/> Strongly disagree<br><input type="radio"/> Somewhat disagree<br><input type="radio"/> Neither disagree nor agree<br><input type="radio"/> Somewhat agree<br><input type="radio"/> Strongly agree<br><input type="radio"/> Don't know                                    |
| <b>Demographics</b>                                                                                                                                                                                                                                                                                                                                                                                  |                                                                                                                                                                                                                                                                                               |
| 32. What is your gender?                                                                                                                                                                                                                                                                                                                                                                             | <input type="radio"/> Male<br><input type="radio"/> Female<br><input type="radio"/> Non-binary / third gender<br><input type="radio"/> Prefer not to say                                                                                                                                      |
| 33. What is your age?                                                                                                                                                                                                                                                                                                                                                                                | _____                                                                                                                                                                                                                                                                                         |

|                                                                                                                                                                                                             |                                                                                                                                                                                                                                                                                                                                                                                                                                                                                                                                                                                                                                                                                               |
|-------------------------------------------------------------------------------------------------------------------------------------------------------------------------------------------------------------|-----------------------------------------------------------------------------------------------------------------------------------------------------------------------------------------------------------------------------------------------------------------------------------------------------------------------------------------------------------------------------------------------------------------------------------------------------------------------------------------------------------------------------------------------------------------------------------------------------------------------------------------------------------------------------------------------|
| 34. What is your highest educational level (completed)?                                                                                                                                                     | <input type="radio"/> No formal education<br><input type="radio"/> Primary education<br><input type="radio"/> Secondary education<br><input type="radio"/> Vocational/trade qualification<br><input type="radio"/> University education or higher degree<br><input type="radio"/> Other (please specify): _____                                                                                                                                                                                                                                                                                                                                                                               |
| 35. What is your annual household income (including everyone who lives in your home)?                                                                                                                       | <input type="radio"/> Less than \$50,000<br><input type="radio"/> \$50,001 to \$100,000<br><input type="radio"/> \$100,001 to \$150,000<br><input type="radio"/> More than \$150,000<br><input type="radio"/> Prefer not to say                                                                                                                                                                                                                                                                                                                                                                                                                                                               |
| 36. Do you identify as Aboriginal and/or Torres Strait Islander?                                                                                                                                            | <input type="radio"/> Yes<br><input type="radio"/> No<br><input type="radio"/> Prefer not to say                                                                                                                                                                                                                                                                                                                                                                                                                                                                                                                                                                                              |
| 37. Is English your first language?                                                                                                                                                                         | <input type="radio"/> Yes<br><input type="radio"/> No                                                                                                                                                                                                                                                                                                                                                                                                                                                                                                                                                                                                                                         |
| 38. Please include any comments about your feelings and thoughts about your [chronic disease] and COVID-19 vaccination that you would like to share. If you have no comments to include, please type 'Nil'. | [Text entry]: _____                                                                                                                                                                                                                                                                                                                                                                                                                                                                                                                                                                                                                                                                           |
| <b>Disease-specific clinical questions (Cancer only)</b>                                                                                                                                                    |                                                                                                                                                                                                                                                                                                                                                                                                                                                                                                                                                                                                                                                                                               |
| 39. What type of cancer do you have? (i.e. where your cancer started and not where it has spread to).                                                                                                       | <input type="radio"/> Breast<br><input type="radio"/> Lung (including mesothelioma)<br><input type="radio"/> Genitourinary (i.e. prostate, kidney, testicular or bladder)<br><input type="radio"/> Skin (including melanoma)<br><input type="radio"/> Gastrointestinal (i.e. stomach, oesophagus, bile duct, gallbladder, pancreas, colon, rectum, or anus)<br><input type="radio"/> Gynaecological (i.e. ovarian, cervical, uterine or vulvar/vaginal)<br><input type="radio"/> Head and neck (i.e. mouth, throat, sinus or nose)<br><input type="radio"/> Brain<br><input type="radio"/> Blood (i.e. leukemia, myeloma and lymphoma)<br><input type="radio"/> Other (please specify): _____ |
| 40. When was your cancer diagnosed?                                                                                                                                                                         | <input type="radio"/> Less than 6 months ago<br><input type="radio"/> 6 to 24 months ago<br><input type="radio"/> 2 to 5 years ago<br><input type="radio"/> More than 5 years ago                                                                                                                                                                                                                                                                                                                                                                                                                                                                                                             |
| 41. As you understand it, is your cancer in just the one area where it started (localised) or has it spread to other places in the body (metastatic)?                                                       | <input type="radio"/> Localised<br><input type="radio"/> Metastatic<br><input type="radio"/> Don't know<br><input type="radio"/> Other (please type any comments): _____                                                                                                                                                                                                                                                                                                                                                                                                                                                                                                                      |
| 42. Are you currently on cancer treatment?                                                                                                                                                                  | <input type="radio"/> Yes<br><input type="radio"/> No                                                                                                                                                                                                                                                                                                                                                                                                                                                                                                                                                                                                                                         |
| 43. How long ago was your last treatment? (e.g. chemotherapy, immunotherapy, hormonal treatment, targeted therapy, radiotherapy and/or clinical trial).                                                     | <input type="radio"/> Currently on treatment<br><input type="radio"/> Less than 1 year ago<br><input type="radio"/> 1 to 5 years ago<br><input type="radio"/> More than 5 years ago                                                                                                                                                                                                                                                                                                                                                                                                                                                                                                           |
| <b>Disease-specific clinical questions (Diabetes only)</b>                                                                                                                                                  |                                                                                                                                                                                                                                                                                                                                                                                                                                                                                                                                                                                                                                                                                               |
| 39. What type of diabetes do you have?                                                                                                                                                                      | <input type="radio"/> Type 1<br><input type="radio"/> Type 2<br><input type="radio"/> Other (please specify): _____<br><input type="radio"/> Don't know                                                                                                                                                                                                                                                                                                                                                                                                                                                                                                                                       |
| 40. How long have you had diabetes?                                                                                                                                                                         | <input type="radio"/> Less than 1 year<br><input type="radio"/> 1 to 5 years<br><input type="radio"/> 5.1 to 10 years<br><input type="radio"/> More than 10 years                                                                                                                                                                                                                                                                                                                                                                                                                                                                                                                             |
| 41. My most recent HbA1c (within the past year) was:                                                                                                                                                        | <input type="radio"/> Less than 7%<br><input type="radio"/> 7% to 8.5%<br><input type="radio"/> 8.6% to 10%<br><input type="radio"/> More than 10%<br><input type="radio"/> Don't know                                                                                                                                                                                                                                                                                                                                                                                                                                                                                                        |

|                                                                                                                                                                                      |                                                                                                                                                                                                                                                                               |
|--------------------------------------------------------------------------------------------------------------------------------------------------------------------------------------|-------------------------------------------------------------------------------------------------------------------------------------------------------------------------------------------------------------------------------------------------------------------------------|
| 42. My current treatment for my diabetes is/are (select all that apply):                                                                                                             | <input type="checkbox"/> Insulin<br><input type="checkbox"/> Tablets<br><input type="checkbox"/> Diet only<br><input type="checkbox"/> Injectables (not insulin)<br><input type="checkbox"/> Other: _____                                                                     |
| 43. In the past month, would you say that your management of diabetes was:                                                                                                           | <input type="checkbox"/> Excellent<br><input type="checkbox"/> Very good<br><input type="checkbox"/> Good<br><input type="checkbox"/> Fair<br><input type="checkbox"/> Poor                                                                                                   |
| 44. In the last four weeks, how much did your diabetes affect your daily activities?                                                                                                 | <input type="checkbox"/> All the time<br><input type="checkbox"/> Most of the time<br><input type="checkbox"/> Some of the time<br><input type="checkbox"/> Not very often<br><input type="checkbox"/> Not at all                                                             |
| <b>Disease-specific clinical questions (Multiple Sclerosis only)</b>                                                                                                                 |                                                                                                                                                                                                                                                                               |
| 39. What type of MS do you have?                                                                                                                                                     | <input type="checkbox"/> Relapsing-remitting MS (RRMS)<br><input type="checkbox"/> Primary progressive MS (PPMS)<br><input type="checkbox"/> Secondary progressive MS (SPMS)<br><input type="checkbox"/> Other (please specify): _____<br><input type="checkbox"/> Don't know |
| 40. How long have you had MS?                                                                                                                                                        | <input type="checkbox"/> Less than 1 year<br><input type="checkbox"/> 1 to 5 years<br><input type="checkbox"/> 5.1 to 10 years<br><input type="checkbox"/> More than 10 years                                                                                                 |
| 41. My current treatment for my MS is/are (select all that apply):                                                                                                                   | <input type="checkbox"/> Tablets<br><input type="checkbox"/> Injectables<br><input type="checkbox"/> Intravenous<br><input type="checkbox"/> No specific treatment<br><input type="checkbox"/> Other: _____                                                                   |
| 42. Over the past 6 months, is your MS well controlled?                                                                                                                              | <input type="checkbox"/> Yes<br><input type="checkbox"/> No<br><input type="checkbox"/> Don't know                                                                                                                                                                            |
| 43. People often have difficulty taking their medications for one reason or another. How many times have you missed taking your disease modifying therapies (DMT) in the past month? | <input type="checkbox"/> All of the time<br><input type="checkbox"/> Most of the time<br><input type="checkbox"/> Some of the time<br><input type="checkbox"/> Occasionally<br><input type="checkbox"/> Never                                                                 |
| 44. In the last four weeks, how much did your MS affect your daily activities?                                                                                                       | <input type="checkbox"/> All the time<br><input type="checkbox"/> Most of the time<br><input type="checkbox"/> Some of the time<br><input type="checkbox"/> Not very often<br><input type="checkbox"/> Not at all                                                             |

**Table S2.** Participant characteristics, by vaccination status and disease.

|                                      | All diseases<br>n, (%)   |                           |                     |                   | Cancer<br>n, (%)         |                           |                     |                   | Diabetes<br>n, (%)      |                         |                     |                   | MS<br>n, (%)            |                          |                     |                   |
|--------------------------------------|--------------------------|---------------------------|---------------------|-------------------|--------------------------|---------------------------|---------------------|-------------------|-------------------------|-------------------------|---------------------|-------------------|-------------------------|--------------------------|---------------------|-------------------|
| Characteristics                      | Vaccinated<br>(n = 3813) | Unvaccinated<br>(n = 868) | p <sup>a</sup>      | φ <sup>b</sup>    | Vaccinated<br>(n = 2884) | Unvaccinated<br>(n = 674) | p <sup>a</sup>      | φ <sup>b</sup>    | Vaccinated<br>(n = 696) | Unvaccinated<br>(n=146) | p <sup>a</sup>      | φ <sup>b</sup>    | Vaccinated<br>(n = 233) | Unvaccinated<br>(n = 48) | p <sup>a</sup>      | φ <sup>b</sup>    |
| <b>Gender</b>                        |                          |                           | 0.002               | 0.05              |                          |                           | 0.004               | 0.05              |                         |                         | 0.37                | 0.03              |                         |                          | 0.35                | 0.07              |
| Male                                 | 1758 (83.5)              | 348 (16.5)                |                     |                   | 1318 (83.2)              | 266 (16.8)                |                     |                   | 383 (83.8)              | 74 (16.2)               |                     |                   | 57 (87.7)               | 8 (12.3)                 |                     |                   |
| Female                               | 2034 (79.8)              | 514 (20.2)                |                     |                   | 1553 (79.4)              | 404 (20.6)                |                     |                   | 307 (81.2)              | 71 (18.8)               |                     |                   | 174 (81.7)              | 39 (18.3)                |                     |                   |
| Non-Binary/Other                     | 21 (77.8)                | 6 (22.2)                  |                     |                   | 13 (76.5)                | 4 (23.5)                  |                     |                   | 6 (85.7)                | 1 (14.3)                |                     |                   | 2 (66.7)                | 1 (33.3)                 |                     |                   |
| <b>Age</b>                           |                          |                           | <0.001 <sup>c</sup> | 0.03 <sup>c</sup> |                          |                           | <0.001 <sup>c</sup> | 0.04 <sup>c</sup> |                         |                         | <0.001 <sup>c</sup> | 0.03 <sup>c</sup> |                         |                          | <0.001 <sup>c</sup> | 0.06 <sup>c</sup> |
| Mean (SD)                            | 61.8 (13.0)              | 55.6 (13.5)               |                     |                   | 64.1 (11.7)              | 57.9 (12.3)               |                     |                   | 56.3 (14.3)             | 49.8 (14.6)             |                     |                   | 49.1 (12.6)             | 40.6 (11.7)              |                     |                   |
| 18 – 29                              | 79 (66.4)                | 40 (33.6)                 |                     |                   | 13 (52.0)                | 12 (48.0)                 |                     |                   | 47 (72.3)               | 18 (27.7)               |                     |                   | 19 (65.5)               | 10 (34.5)                |                     |                   |
| 30 – 49                              | 576 (72.6)               | 217 (27.4)                |                     |                   | 341 (70.3)               | 144 (29.7)                |                     |                   | 141 (75.8)              | 45 (24.2)               |                     |                   | 94 (77.0)               | 28 (23.0)                |                     |                   |
| 50 – 69                              | 1953 (80.1)              | 486 (19.9)                |                     |                   | 1458 (78.2)              | 406 (21.8)                |                     |                   | 384 (84.4)              | 71 (15.6)               |                     |                   | 111 (92.5)              | 9 (7.5)                  |                     |                   |
| ≥70                                  | 1202 (90.6)              | 125 (9.4)                 |                     |                   | 1069 (90.5)              | 112 (9.5)                 |                     |                   | 124 (91.2)              | 12 (8.8)                |                     |                   | 9 (90.0)                | 1 (10.0)                 |                     |                   |
| <b>Highest level of education</b>    |                          |                           | <0.001              | 0.07 <sup>d</sup> |                          |                           | <0.001              | 0.07 <sup>d</sup> |                         |                         | 0.37                | 0.06 <sup>d</sup> |                         |                          | 0.23                | 0.12 <sup>d</sup> |
| No formal/ Primary                   | 96 (73.3)                | 35 (26.7)                 |                     |                   | 66 (73.3)                | 24 (26.7)                 |                     |                   | 27 (73.0)               | 10 (27.0)               |                     |                   | 3 (75.0)                | 1 (25.0)                 |                     |                   |
| Secondary                            | 1272 (81.0)              | 298 (19.0)                |                     |                   | 931 (79.9)               | 234 (20.1)                |                     |                   | 268 (84.0)              | 51 (16.0)               |                     |                   | 73 (84.9)               | 13 (15.1)                |                     |                   |
| Vocational/Trade                     | 951 (79.1)               | 251 (20.9)                |                     |                   | 705 (78.7)               | 191 (21.3)                |                     |                   | 189 (81.8)              | 42 (18.2)               |                     |                   | 57 (76.0)               | 18 (24.0)                |                     |                   |
| University                           | 1487 (84.3)              | 277 (15.7)                |                     |                   | 1175 (84.2)              | 221 (15.8)                |                     |                   | 212 (83.8)              | 41 (16.2)               |                     |                   | 100 (87.0)              | 15 (13.0)                |                     |                   |
| Other                                | 7 (50.0)                 | 7 (50.0)                  |                     |                   | 7 (63.6)                 | 4 (36.4)                  |                     |                   | 0 (0.0)                 | 2 (100.0)               |                     |                   | 0 (0.0)                 | 1 (100.0)                |                     |                   |
| <b>Annual household income (AUD)</b> |                          |                           | <0.001              | 0.08 <sup>d</sup> |                          |                           | <0.001              | 0.09 <sup>d</sup> |                         |                         | 0.04                | 0.11 <sup>d</sup> |                         |                          | 0.58                | 0.10 <sup>d</sup> |
| <50,000                              | 1260 (81.4)              | 288 (18.6)                |                     |                   | 915 (79.4)               | 238 (20.6)                |                     |                   | 283 (87.6)              | 40 (12.4)               |                     |                   | 62 (86.1)               | 10 (13.9)                |                     |                   |
| 50,000 - 100,000                     | 946 (82.5)               | 201 (17.5)                |                     |                   | 712 (83.4)               | 142 (16.6)                |                     |                   | 175 (80.5)              | 42 (19.4)               |                     |                   | 59 (77.6)               | 17 (22.4)                |                     |                   |
| 100,000 - 150,000                    | 466 (78.3)               | 129 (21.7)                |                     |                   | 363 (78.6)               | 99 (21.4)                 |                     |                   | 70 (76.1)               | 22 (23.9)               |                     |                   | 33 (80.5)               | 8 (19.5)                 |                     |                   |
| >150,000                             | 489 (87.9)               | 67 (12.1)                 |                     |                   | 412 (88.8)               | 52 (11.2)                 |                     |                   | 42 (80.8)               | 10 (19.2)               |                     |                   | 35 (87.5)               | 5 (12.5)                 |                     |                   |
| Prefer not to say                    | 652 (78.1)               | 183 (21.9)                |                     |                   | 482 (77.1)               | 143 (22.9)                |                     |                   | 126 (79.7)              | 32 (20.3)               |                     |                   | 44 (84.6)               | 8 (15.4)                 |                     |                   |
| <b>English as primary language</b>   |                          |                           | <0.001              | 0.07              |                          |                           | <0.001              | 0.11              |                         |                         | 0.24                | -0.04             |                         |                          | 0.43                | 0.06              |
| Yes                                  | 3437 (82.4)              | 735 (17.6)                |                     |                   | 2668 (82.4)              | 570 (17.6)                |                     |                   | 554 (81.8)              | 123 (18.2)              |                     |                   | 215 (83.7)              | 42 (16.3)                |                     |                   |
| No                                   | 376 (74.0)               | 132 (26.0)                |                     |                   | 216 (67.7)               | 103 (32.3)                |                     |                   | 142 (86.1)              | 23 (13.9)               |                     |                   | 18 (75.0)               | 6 (25.0)                 |                     |                   |
| <b>Location</b>                      |                          |                           | <0.001              | 0.06              |                          |                           | <0.001              | 0.08              |                         |                         | 0.60                | -0.02             |                         |                          | 0.14                | 0.10              |
| Metropolitan location                | 2686 (83.1)              | 548 (16.9)                |                     |                   | 1987 (83.1)              | 403 (16.9)                |                     |                   | 497 (82.1)              | 108 (17.9)              |                     |                   | 202 (84.5)              | 37 (15.5)                |                     |                   |
| Regional/Rural location              | 1127 (77.9)              | 320 (22.1)                |                     |                   | 897 (76.8)               | 271 (23.2)                |                     |                   | 199 (84.0)              | 38 (16.0)               |                     |                   | 31 (73.8)               | 11 (26.2)                |                     |                   |

Abbreviations: AUD, Australian Dollars.

<sup>a</sup> Chi-square p-value for differences between vaccination status. Chi-square analyses for gender did not include non-binary/other categories and for highest educational level, it did not include the other category.

<sup>b</sup> Phi coefficient.

<sup>c</sup> Independent samples t-test p-value and eta squared reported, as they were used to measure differences between vaccination status and effect size for age as a continuous variable, respectively.

<sup>d</sup> Cramer's V reported.

Significant differences between vaccinated and not vaccinated for patients who identify as Aboriginal and/or Torres Strait Islander were detected only for: 1) all diseases (p<0.001) and 2) cancer (p=0.003).



**Figure S1.** Response frequencies for each Disease Influenced Vaccine Acceptance Scale-Six item, by chronic disease type and vaccination status (a-f). 'Don't know' responses have been excluded.

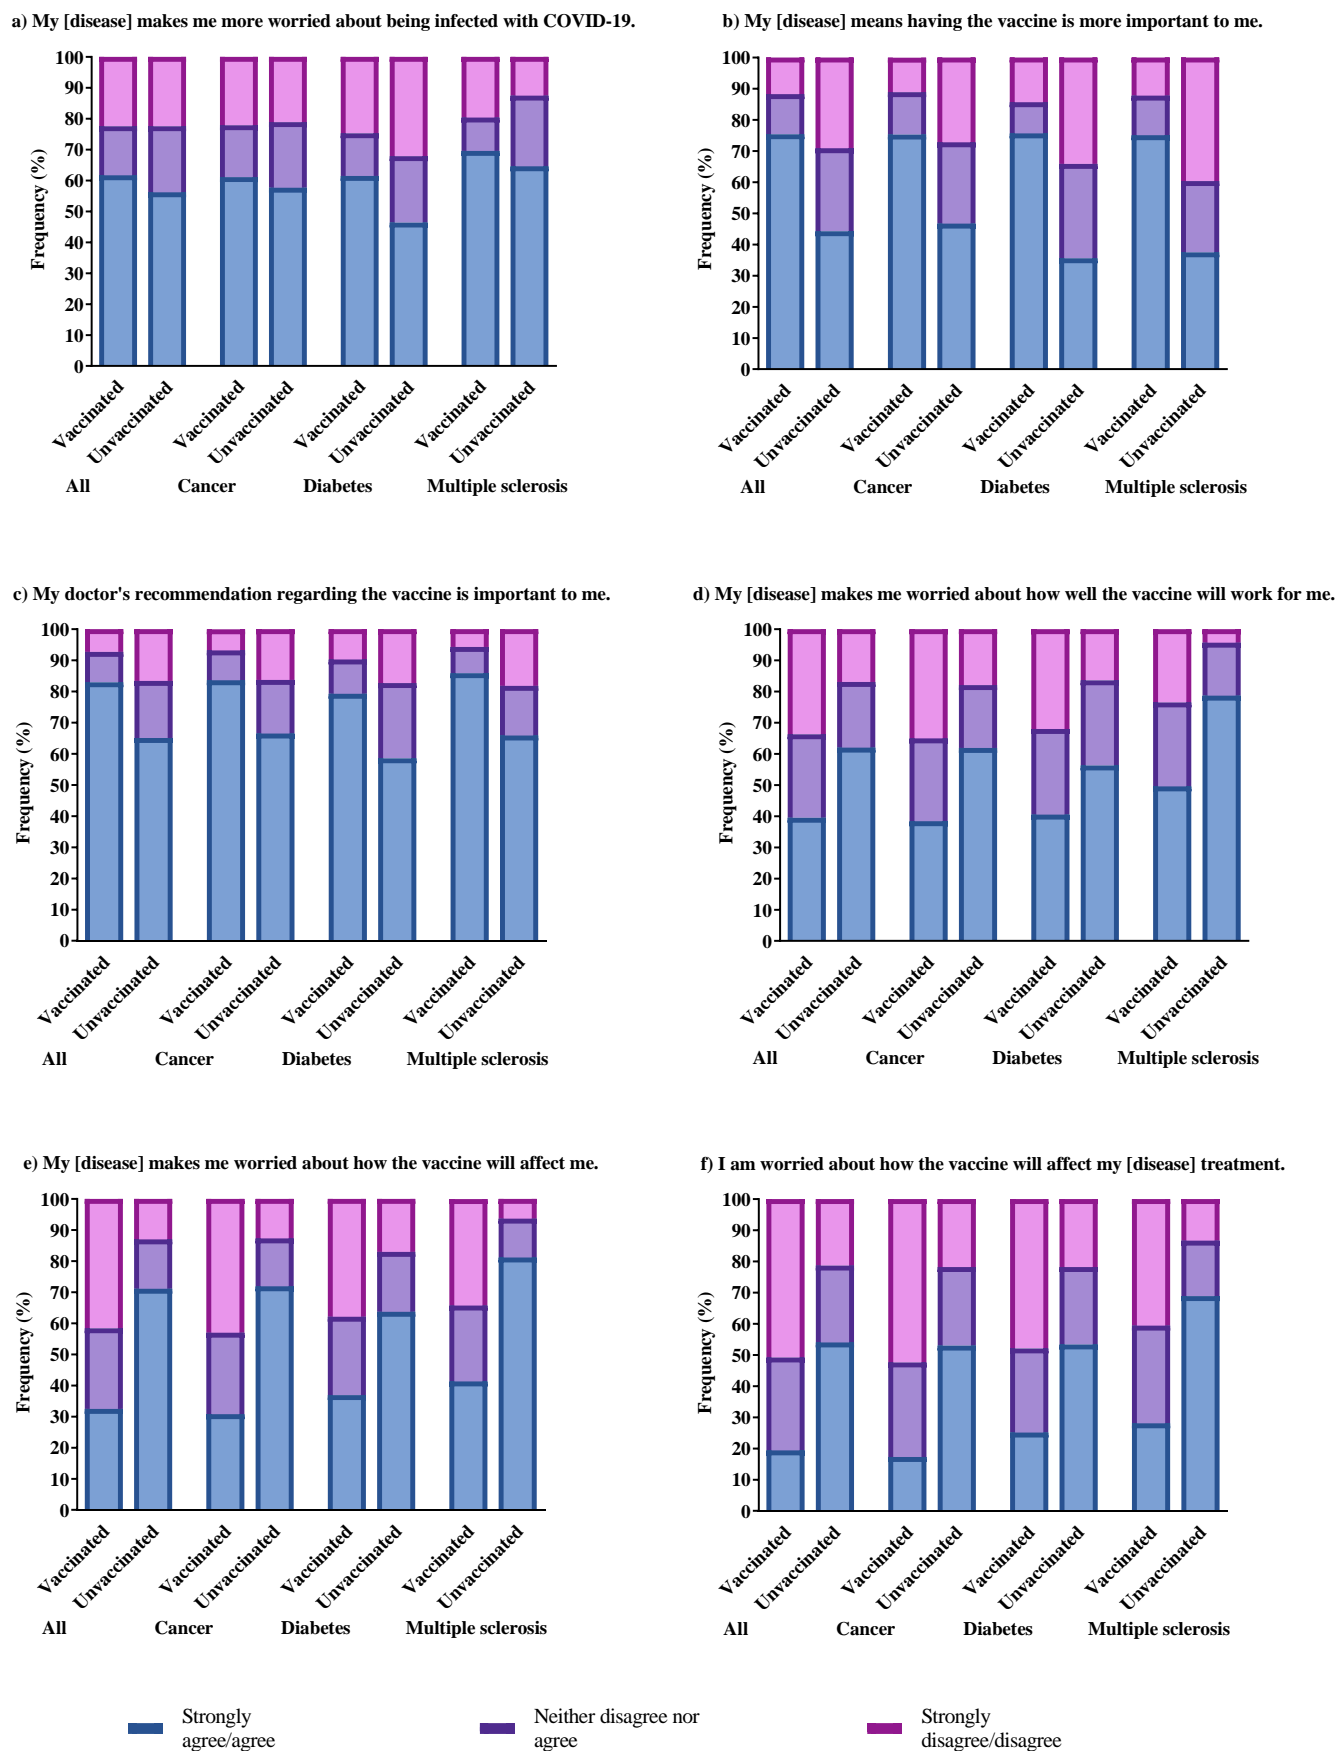

Supplement: s1 [file s1]
